# Supplementary material
Source: PubMed Central journal article supplement (PMC5210707)
Supplement: supp_pp.16.00629_PP2016-00629R2_Supplemental_Material.pdf [file supp_pp.16.00629_PP2016-00629R2_Supplemental_Material.pdf]

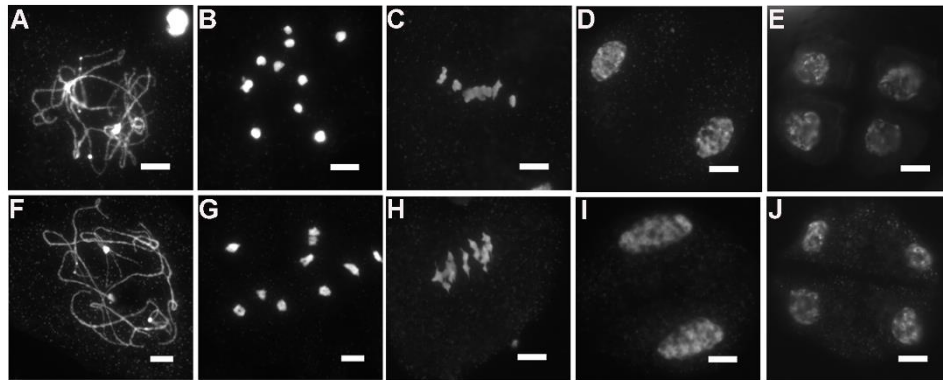

**Supplemental Figure S1.** DAPI Staining of Chromosomes of Wild Type and *ipe1* in Meiosis.

Compared with the wild type ([A] to [E]), meiosis was normal in the *ipe1* mutant ([F] to [J]). (A) and (F), Pachytene; (B) and (G), Diakinesis; (C) and (H), Metaphase I; (D) and (I), Telophase I; (E) and (J), Telophase II. Bars = 10  $\mu$ m.

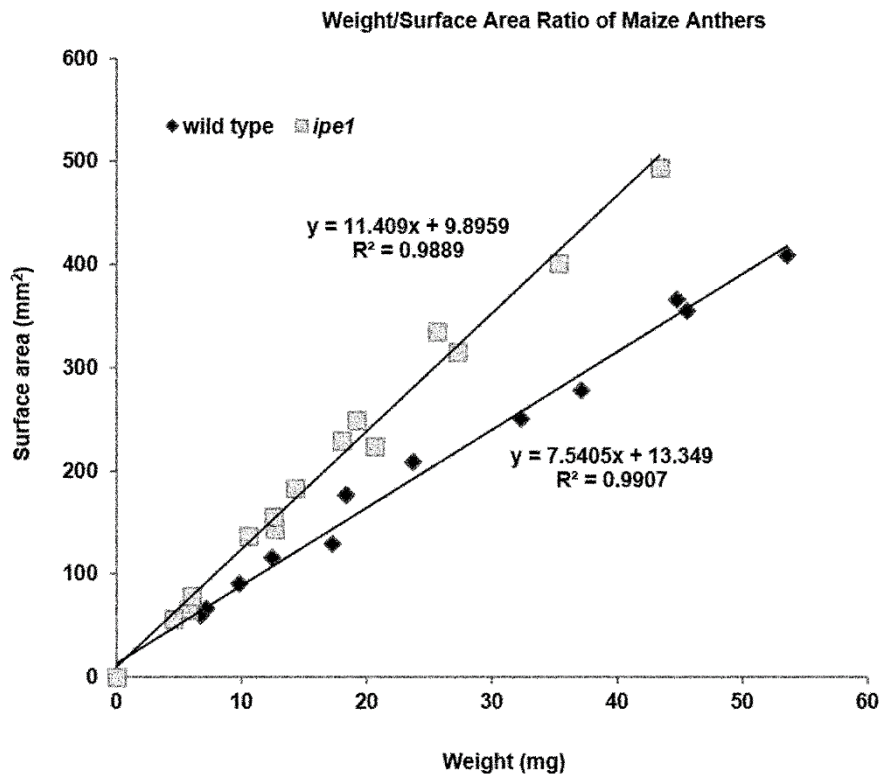

**Supplemental Figure S2.** Weight/Surface Area Ratio of the Wild Type and *ipe1* Anthers.

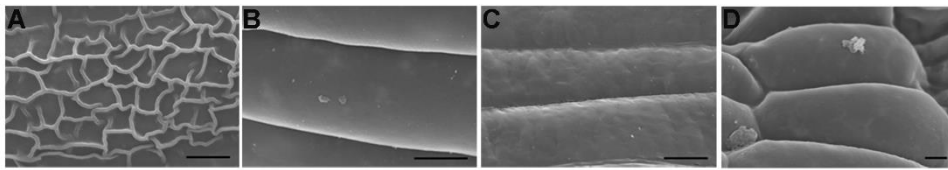

**Supplemental Figure S3.** SEM Observation of the Anther Surface.

The wild-type anther surface consists of the reticular anther cuticle (A), whereas the surface is smooth in *ipe1-1* (B), *ipe1-2* (C), and *ipe1-3* (D). Bars = 5  $\mu$ m.

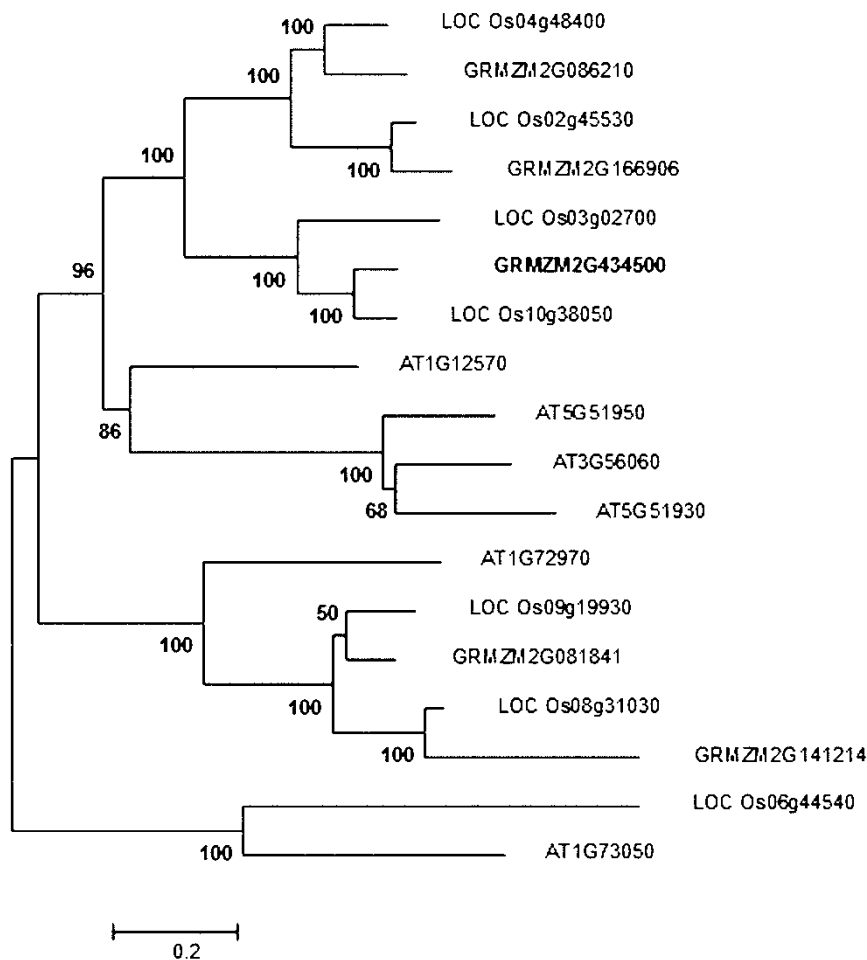

**Supplemental Figure S4.** The Phylogenetic Tree of IPE1-Related Proteins.

A neighbor-joining phylogenetic tree summarizes the evolutionary relationships between the IPE1-related proteins (E value of BLASTP result is  $< 1E-100$ ). The proteins are named according to their gene names or Phytozome accession numbers. The numbers under the branches refer to the bootstrap value of the neighbor-joining phylogenetic tree. The length of the branches is proportional to the amino acid variation rates. Os, *Oryza sativa*; Zm, *Zea mays*; At, *Arabidopsis thaliana*. The bar indicates the estimated number of amino acid substitutions per site.

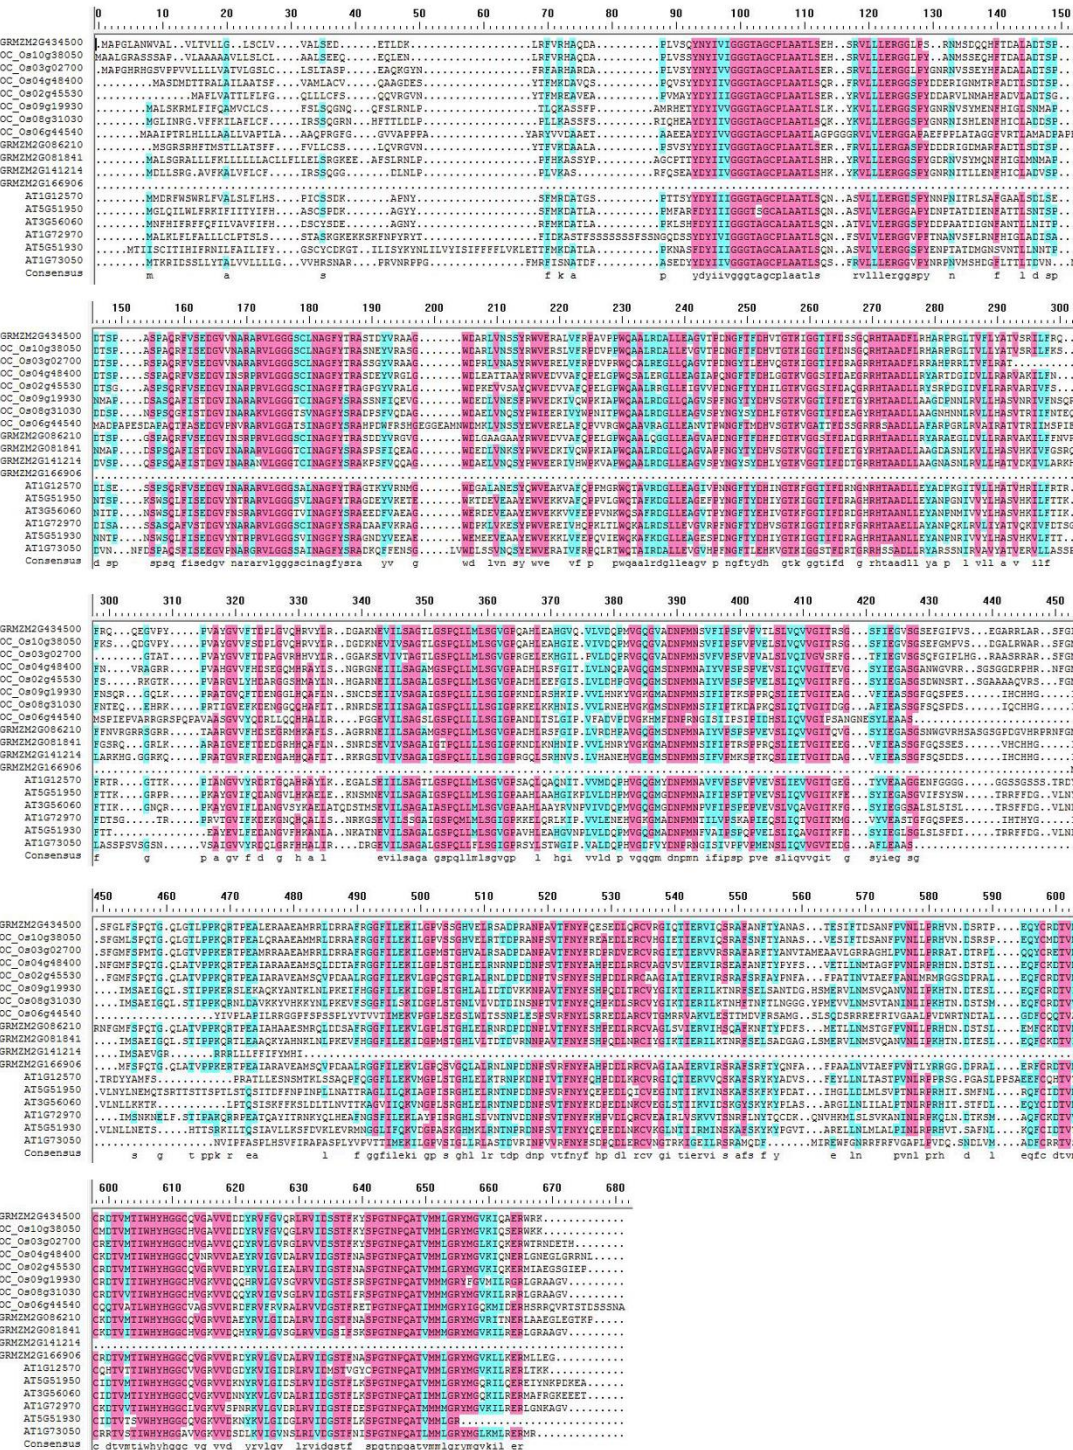

Supplemental Figure S5. The Sequence Alignment of IPE1 and 17 IPE1-Related Proteins

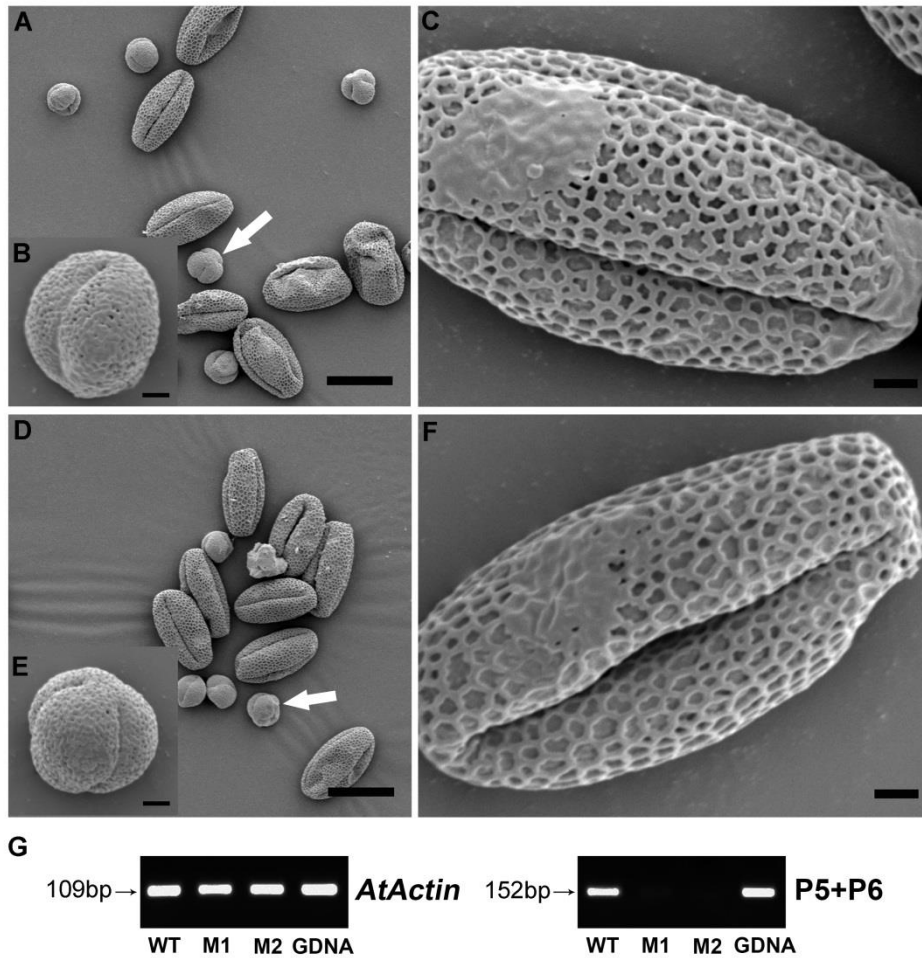

**Supplemental Figure S6.** Phenotypes of Two Additional T-DNA Insertional Lines of *ATIG12570*.

(A) to (C) Phenotypes of the T-DNA insertional line SALK-112758.

(D) to (F) Phenotypes of the T-DNA insertional line SALK-031400.

(A) and (D) Smaller pollen grains appeared in the two T-DNA insertional line (arrowhead).

Bars = 20  $\mu$ m.

(B) and (E) The magnification of a smaller pollen grain. Bars = 2  $\mu$ m.

(C) and (F) The defective pollen exine. Bars = 2  $\mu$ m.

(G) RT-PCR analysis of the two additional T-DNA insertional lines. WT, wild type; M1, the line SALK-031400; M2, the line SALK-112758; GDNA, genomic DNA.

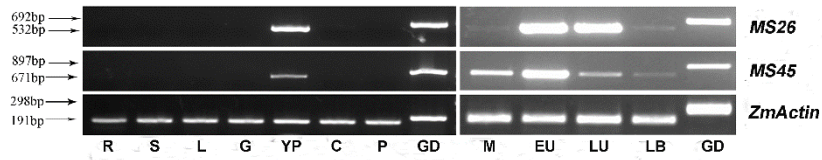

**Supplemental Figure S7.** The Spatial and Temporal Expression of *MS26* and *MS45* by RT-PCR.

The transcripts of *MS26* and *MS45* were only detected in young spikelets, and the level peaked in anthers at the early uninucleate microspore stage. R, roots; S, stems; L, leaves; G, glumes; YP, young spikelets; C, cobs; P, pistils. GD, genomic DNA. M, anthers in the meiosis stage; EU, anthers in early uninucleate microspore stage; LU, anthers in late uninucleate microspore stage; LB, anthers in late binucleate microspore stage. *ZmActin* was used as a positive control.

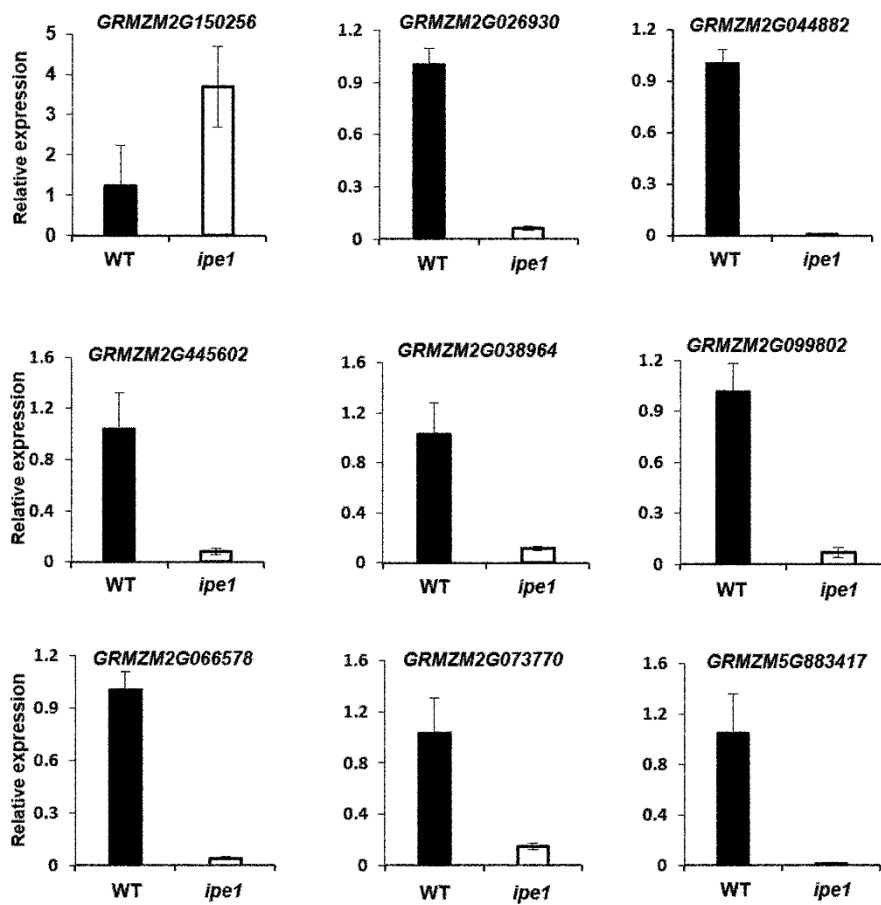

**Supplemental Figure S8.** qRT-PCR Analysis of Randomly Selected Nine Differential Expressed Genes in *ipe1*(n=3).



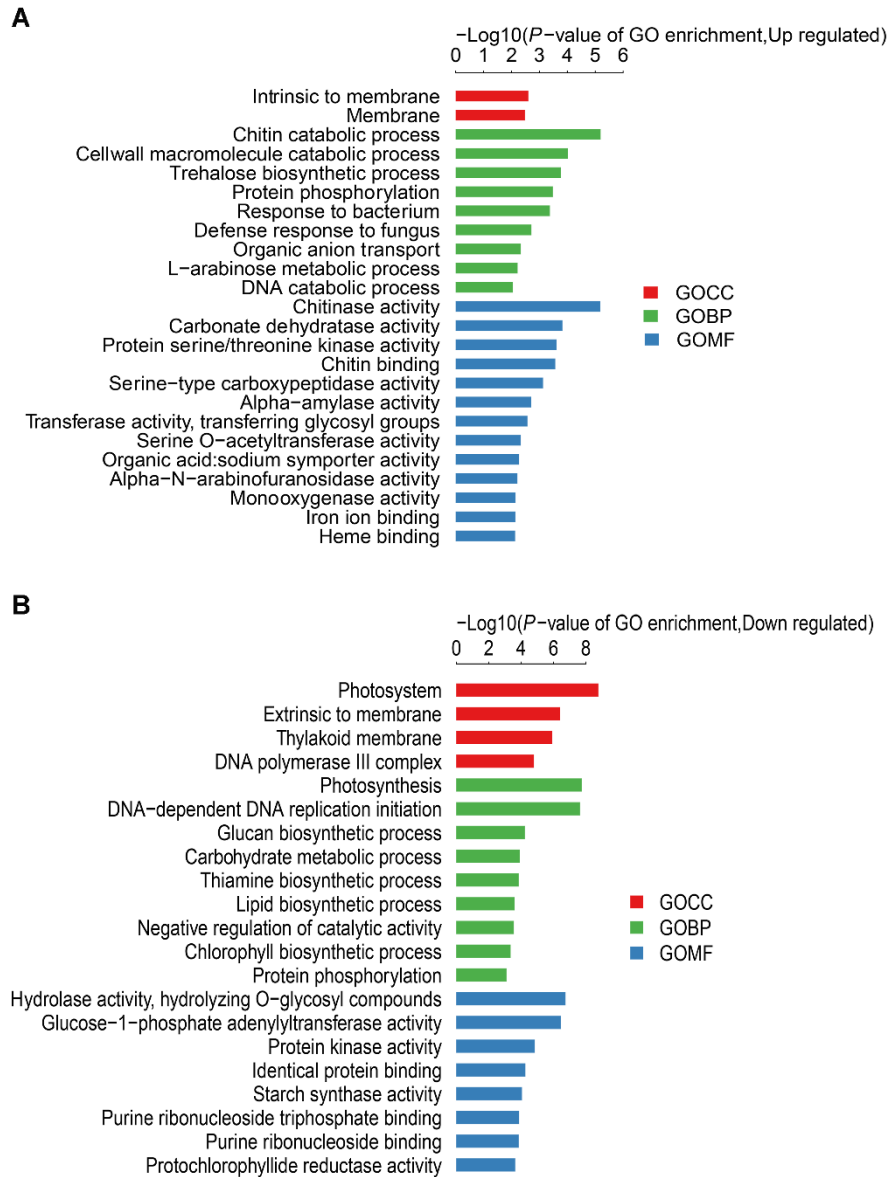

**Supplemental Figure S9.** Significantly Enriched Gene Ontology (GO) Terms of the Up-Regulated Genes (A) and Down-Regulated (B) in *ipe1*.

GO terms belonging to cellular components (GOCC), biological processes (GOBP), and molecular functions (GOMF) are shown in red, green, and blue, respectively.

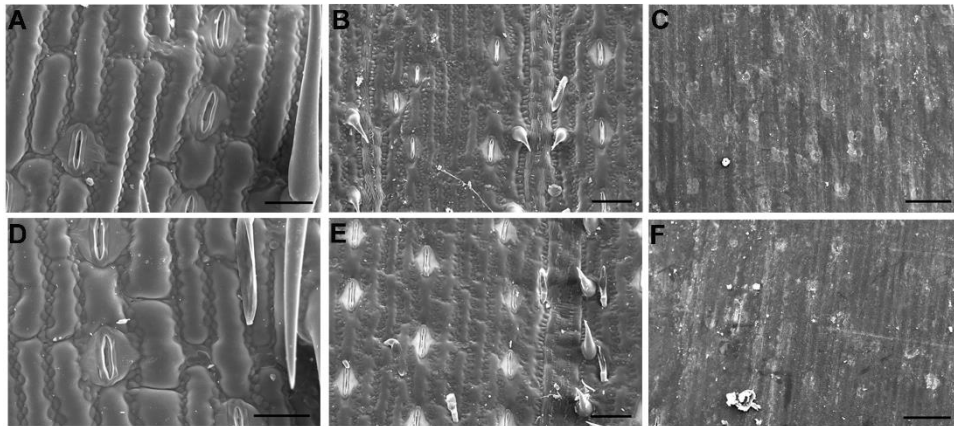

**Supplemental Figure S10.** SEM Analysis of the Surface of Glume, Leaf and Stem in Wild Type and *ipe1*.

The normal surface structures of glume [(A) and (D)], leaf [(B) and (E)] and stem [(C) and (F)] are shown in wild type [(A) to (C)] and *ipe1* mutant [(D) to (F)]. Bars = 30  $\mu\text{m}$  in (A) and (D); 60  $\mu\text{m}$  in (B), (C), (E) and (F).

| Cutin monomers            | Wild Type                            | <i>ipe1</i>        | Up       |
|---------------------------|--------------------------------------|--------------------|----------|
|                           | Mean $\pm$ SD (ng mm <sup>-2</sup> ) |                    |          |
| C16:1 acid                | 0.460 $\pm$ 0.286                    | 0.118 $\pm$ 0.068  | -290.86% |
| C16:0 acid                | 63.795 $\pm$ 10.238                  | 14.812 $\pm$ 2.112 | -330.70% |
| C18:0 acid                | 5.571 $\pm$ 3.631                    | 1.098 $\pm$ 0.805  | -407.45% |
| C18:1 acid                | 2.995 $\pm$ 1.513                    | 0.557 $\pm$ 0.285  | -437.99% |
| C18:2 acid                | 110.962 $\pm$ 23.858                 | 25.079 $\pm$ 5.269 | -342.46% |
| C18:3 acid                | 153.555 $\pm$ 9.809                  | 40.746 $\pm$ 2.113 | -276.86% |
| C20:0 acid                | 4.274 $\pm$ 2.729                    | 0.780 $\pm$ 0.537  | -447.81% |
| C22:0 acid                | 1.612 $\pm$ 1.292                    | 0.331 $\pm$ 0.324  | -387.43% |
| C24:0 acid                | 1.163 $\pm$ 0.967                    | 0.185 $\pm$ 0.244  | -528.33% |
| C26:0 acid                | 0.455 $\pm$ 0.336                    | 0.065 $\pm$ 0.081  | -599.12% |
| C16:0 $\beta$ -OH acid    | 0.525 $\pm$ 0.065                    | 0.129 $\pm$ 0.021  | -306.68% |
| C18:0 $\beta$ -OH acid    | 0.308 $\pm$ 0.128                    | 0.061 $\pm$ 0.019  | -406.82% |
| C22:0 $\beta$ -OH acid    | 1.592 $\pm$ 1.757                    | 0.235 $\pm$ 0.319  | -578.34% |
| C24:0 $\beta$ -OH acid    | 5.674 $\pm$ 3.998                    | 0.815 $\pm$ 0.777  | -596.88% |
| C26:0 $\beta$ -OH acid    | 3.266 $\pm$ 2.078                    | 0.496 $\pm$ 0.432  | -558.57% |
| C16:0 $\omega$ -OH acid   | 48.643 $\pm$ 9.592                   | 7.593 $\pm$ 1.860  | -540.67% |
| C18:1 $\omega$ -OH acid   | 54.536 $\pm$ 20.574                  | 7.495 $\pm$ 3.059  | -627.62% |
| C18:2 $\omega$ -OH acid   | 18.368 $\pm$ 5.262                   | 2.751 $\pm$ 0.998  | -567.71% |
| C18:0 9/10 di-OH acid     | 0.941 $\pm$ 0.648                    | 0.224 $\pm$ 0.333  | -320.85% |
| C18:0 9/10 di-OH diacid   | 96.746 $\pm$ 25.601                  | 11.761 $\pm$ 4.298 | -722.63% |
| C18:0 9/10/18 tri-OH acid | 22.122 $\pm$ 5.187                   | 3.396 $\pm$ 1.492  | -551.47% |
| C16:0 diacid              | 2.271 $\pm$ 0.648                    | 0.318 $\pm$ 0.102  | -613.53% |
| C18:2 diacid              | 1.957 $\pm$ 0.711                    | 0.190 $\pm$ 0.132  | -932.20% |

**Supplemental Table S1.** The Detailed Cutin Compositions of the Wild-type and *ipe1* Anthers.

| Primer Name    | Forward primers                               | Reverse primers                 | Usage        |
|----------------|-----------------------------------------------|---------------------------------|--------------|
| S1             | GAGAAGGGCGGGAGGAATAAC                         | CGAAGAGCACGATGTTGACG            |              |
| S2             | GGTAGACAGCTGCCGCCACG                          | ACCACCGCCGTAACACGCAG            |              |
| S3             | CGGCAAAGCAGCTGATTCCGGT                        | GGCACAAATGCACCAATCACGGA         |              |
| S4             | AAACCGCCCTGTTCTGTTC                           | AGTCTGGTGCATTTGCCACT            |              |
| S5             | TCGTGATGGTTGTCGGATCG                          | GTACAGGACGACACGACTGG            |              |
| S6             | TTCACCTACGCCAACGCTTC                          | TGGGCTTGGTCTTGTTCAGTT           | <i>IPE1</i>  |
| S7             | GGCTGGCGGGTAGAAGTAGA                          | CTCGGTTGCTCTCAACACGG            | mapping      |
| S8             | GCCAGAGTCGCAGGGCGAAG                          | TCGCTGTGGCTGCCAAGACT            |              |
| S9             | GCGGCAAGCCCATCTGCGAG                          | CCGAAGCGCTCCGACCACGC            |              |
| S10            | TTTAGGCGCGTCGTTCCCTCGG                        | CTCGGCGACACAGCCTCGTC            |              |
| S11            | GGCGTCGCTTTAGCCGTTGC                          | AGCACCATCGTTTTCGCCCCG           |              |
| IPE1           | TTCACCTTCGACCACGTAC                           | CCGAGTTCATCGGGTTGTCA            |              |
| ZmActin        | TCACCCTGTGCTGCTGACCG                          | GAACCGTGTGGCTCACACCA            |              |
| MS26           | ATGCACGACTGGCTTGTCGGGTACC                     | CGTGGAAGAACCTCTTGATGCGCCACA     |              |
| MS45           | CGAGGGCGTGATGGCATCGT                          | GTGCCTTCCTCCTTCTAACAGGATGTTTCAG | RT-PCR       |
| P1/P2          | TTTTTGACCGCAACGGCAAT                          | AGAAGGAACGAACACGGCAT            |              |
| P3/P4          | GCTCAAGACCCGAAACCCAA                          | ACTTCTTGGTGAGTCTCTCTCTC         |              |
| P5/P6          | TTGAATCGGATCAGGGGTTT                          | TCCGTATACATCTCAGTTTGGTC         |              |
| AtActin        | GGTAACATTGTGCTCAGTGGTGG                       | AACGACCTTAATCTTCATGCTGC         |              |
| qIPE1          | TCTTCAGACAGCAAGAGGG                           | CCGACAGGATCACCTCGT              |              |
| qMS26          | GGACGAGTTCACCTACAGC                           | AAGTTGAGCACCACGTCCC             |              |
| qMS45          | GCCTCAGCCCAACAAGC                             | ATGACATGAAACGGTGCCTT            |              |
| qGRMZM2G150256 | TGATCTGTAATGCACGAAGCAC                        | CCAAATCACTTATCCATCGGTT          |              |
| qGRMZM2G026930 | TCTCCCCGTCGATGATGCT                           | CCAGGGGATAAAACAATTTCGT          |              |
| qGRMZM2G044882 | CTCTTCAACCCGCAGATGG                           | TCGTGAACCCGAAGTCTCTG            | qRT-PCR      |
| qGRMZM2G445602 | GCACCAAGTGTTACTATACCG                         | TCCCTCCCTTAACCGCTAC             |              |
| qGRMZM2G038964 | AAGAAGAACTGACGCACGTA                          | TGAACATGTCAACCCATCGC            |              |
| qGRMZM2G099802 | ACTTCAGAAATTGCTAAGCGGTA                       | CTTGTACCCCAAAGTTCAGG            |              |
| qGRMZM2G066578 | TCATGTACACACCCTCGTTT                          | TTCTCATAACAGTGTCCGAT            |              |
| qGRMZM2G073770 | GTTTCGCTGTATGTTTCTCGAC                        | AGCAGCATGATGTAAATTCGT           |              |
| qGRMZM5G883417 | GGCCCAATCTGTCAGCATC                           | GTGCATTTCCAACGCCTCC             |              |
| GFP-F          | GTGTTACTTCTGCAAAGCTTATGGCGCCTGCGCTTGCGAACT    |                                 |              |
| GFP-R          | CCCTTGCTCACCATGGATCCTTTCCCTCCATCTCTCGGCCTGA   |                                 | Subcellular  |
| ΔSP-GFP-F      | GTGTTACTTCTGCAAAGCTTCTGGACAAGCTGCGGTTTCGTGC   |                                 | localization |
| SP-GFP-R       | CCCTTGCTCACCATGGATCCTGTTTCATCCTCCGAGAGCGCG    |                                 |              |
| IPE1-Sp6       | GATTAGGTGACACTATAGaatGCTTCACCGTGTTCCTCTACGCTA |                                 |              |
| IPE1-T7        | tgTAATACGACTCACTATAGGGCTCTGCTTCGGCGGCAAC      |                                 | Probe        |

**Supplemental Table S2.** Primers Used in This Study

| ♀ × ♂                        | Fertile plants | Sterile plants |
|------------------------------|----------------|----------------|
| <i>ipe1-1ipe1-1/IPE1ipe1</i> | 51             | 46             |
| <i>ipe1ipe1/IPE1-1ipe1-1</i> | 132            | 120            |
| <i>ipe1-2ipe1-2/IPE1ipe1</i> | 36             | 35             |
| <i>ipe1ipe1/IPE1-2ipe1-2</i> | 59             | 65             |
| <i>ipe1-3ipe1-3/IPE1ipe1</i> | 52             | 48             |
| <i>ipe1ipe1/IPE1-3ipe1-3</i> | 28             | 32             |

**Supplemental Table S3.** Fertile and Sterile Plants Analysis of F<sub>1</sub> Plants from Genetic Crosses among *ipe1*, *ipe1-1*, *ipe1-2* and *ipe1-3*. *ipe1-1ipe1-1/IPE1ipe1* indicates progeny of the homozygous *ipe1-1* plants crossed with heterozygous *IPE1* plants. *ipe1ipe1/IPE1-1ipe1-1* indicates progeny of the homozygous *ipe1* plants crossed with heterozygous *IPE1-1* plants. *ipe1-2ipe1-2/IPE1ipe1* indicates progeny of the homozygous *ipe1-2* plants crossed with heterozygous *IPE1* plants. *ipe1ipe1/IPE1-2ipe1-2* indicates progeny of the homozygous *ipe1* plants crossed with heterozygous *IPE1-2* plants. *ipe1-3ipe1-3/IPE1ipe1* indicates progeny of the homozygous *ipe1-3* plants crossed with heterozygous *IPE1* plants. *ipe1ipe1/IPE1-3ipe1-3* indicates progeny of the homozygous *ipe1* plants crossed with heterozygous *IPE1-3* plants.

| <b>Gene</b>    | <b>The Tissue of High-Level Expression</b> |
|----------------|--------------------------------------------|
| LOC_Os10g38050 | Pre-emergence inflorescence                |
| LOC_Os03g02700 | Pre-emergence inflorescence                |
| LOC_Os04g48400 | Pre-emergence inflorescence                |
| LOC_Os02g45530 | Pre-emergence inflorescence                |
| LOC_Os09g19930 | Pre-emergence inflorescence                |
| LOC_Os08g31030 | Shoots                                     |
| LOC_Os06g44540 | Pre-emergence inflorescence                |
| GRMZM2G086210  | Meiotic tassel                             |
| GRMZM2G081841  | Immature tassel                            |
| GRMZM2G141214  | Silks                                      |
| GRMZM2G166906  | Meiotic tassel                             |
| AT1G12570      | Flower stage 12, petals                    |
| AT3G56060      | Flower stage 15, petals                    |
| AT5G51950      | Flower stage 15, stamen                    |
| AT1G72970      | Flower stage 12, petals                    |
| AT5G51930      | Mature pollen                              |
| AT1G73050      | Flower stage 9                             |

**Supplemental Table S4.** The Putative Expression Patterns of *IPEI* Homologous Genes
